# Supplementary material
Source: MDPI journal article supplement (https://www.mdpi.com/2071-1050/12/17/6858)
Supplement: s1 [file s1]

XSL Stylesheet: HU Tag Cloud with Code Colors - A simple tag cloud viewer browser for HU entities

**Description:** A tag cloud is a visual depiction of content tags used in your HU. More frequently used tags are depicted in a larger font; display order is alphabetical. This lets you find a tag both by alphabet and by frequency. Codes can also show their assigned colors (both in the code selection and the result box).

HU: DescriptionofBok by Super

## HU Tag Cloud with Code Colors

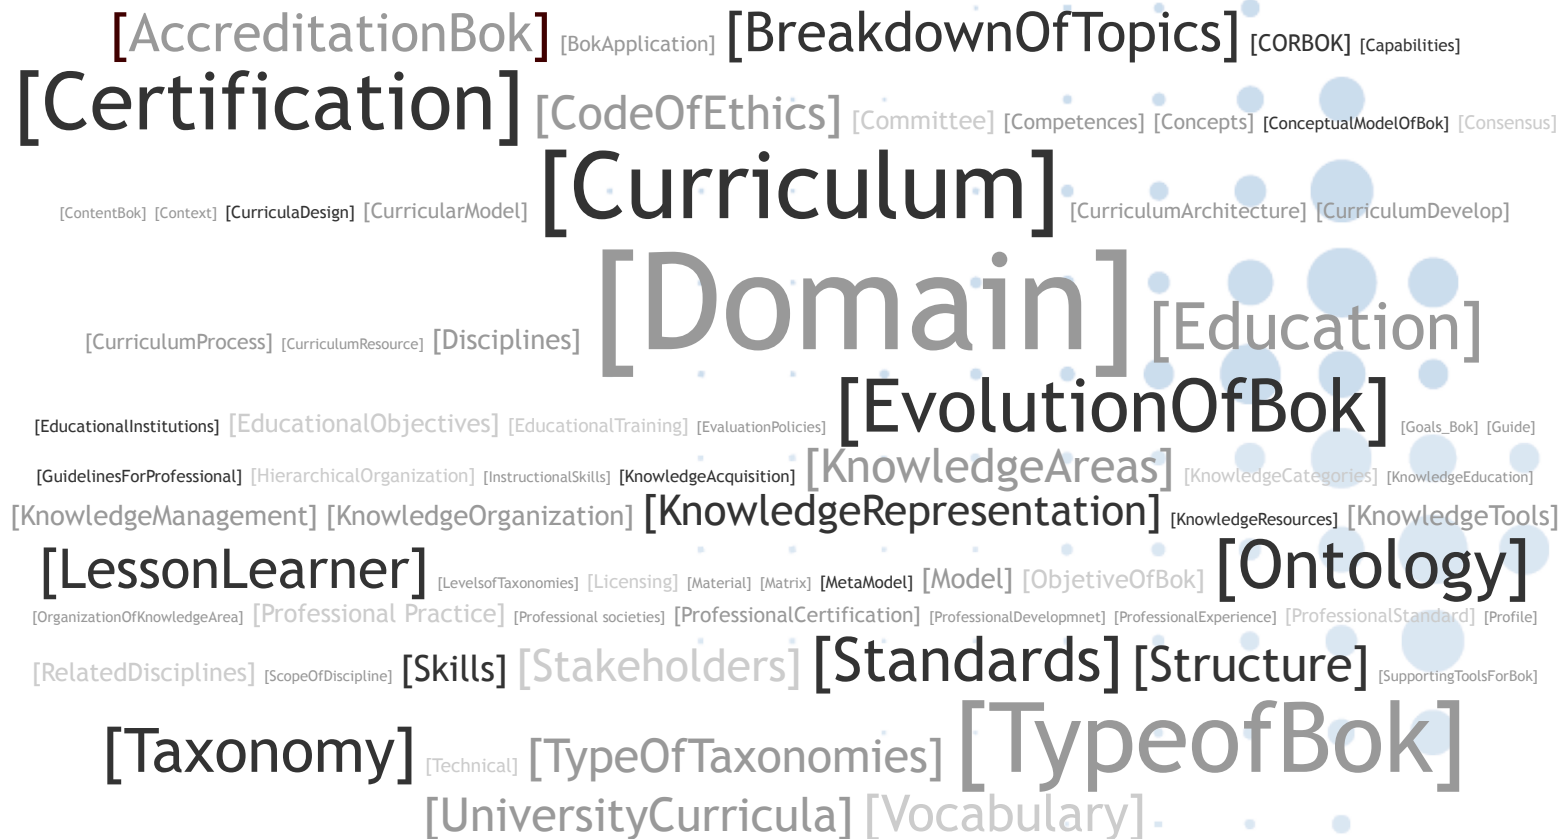

reset
