# Supplementary material
Source: MDPI journal article supplement (https://www.mdpi.com/2071-1050/12/17/6858)
Supplement: s1 [file s1]

# Informe de ATLAS.ti

## Description of Bok

## Vínculos código-código

Informe creado por PabloQuezadaSarmiento on 14 may. 2020

---

- BreakdownOfTopics → – contain → ○ ListAcronyms
- BreakdownOfTopics → – have → ○ ListOfFutureReading
- BreakdownOfTopics → – supported\_by → ○ Reference
- BreakdownOfTopics → – use → ○ Taxonomy
- CodeOfEthics → – is part of → ○ UniversityCurricula
- ContentBok → – include → ○ Disciplines
- Context → – include → ○ BokApplication
- Curriculum → – is associated with → ○ CurricularModel
- Curriculum → – correspond → ○ CurriculumArchitecture
- Curriculum → – is associated with → ○ CurriculumDevelop
- Curriculum → – is associated with → ○ CurriculumProcess
- Curriculum → – is associated with → ○ CurriculumResource
- DescriptionOfBOK → – contain → ○ ElementstoDescribeKnowledgeForBok
- Domain → – apply\_to → ○ Context
- Domain → – include → ○ Stakeholders
- Education → – is associated with → ○ Committee
- Education → – is associated with → ○ EducationalInstitutions

- ⌘ ○ **Education** → – based\_on → ○ **EducationalObjectives**
- ⌘ ○ **Education** → – is associated with → ○ **EducationalTraining**
- ⌘ ○ **Education** → – include → ○ **Guide**
- ⌘ ○ **Education** → – based\_on → ○ **GuidelinesForProfessional**
- ⌘ ○ **Education** → – is associated with → ○ **ProfessionalCertification**
- ⌘ ○ **Education** → – contain → ○ **Profile**
- ⌘ ○ **EducationalTraining** → – is associated with → ○ **UniversityCurricula**
- ⌘ ○ **ElementstoDescribeKnowledgeForBok** → – based\_on → ○ **Domain**
- ⌘ ○ **ElementstoDescribeKnowledgeForBok** → – is associated with → ○ **EvolutionOfBok**
- ⌘ ○ **ElementstoDescribeKnowledgeForBok** → – is associated with → ○ **KnowledgeEducation**
- ⌘ ○ **ElementstoDescribeKnowledgeForBok** → – include → ○ **KnowledgeManagement**
- ⌘ ○ **ElementstoDescribeKnowledgeForBok** → – include → ○ **KnowledgeOrganization**
- ⌘ ○ **ElementstoDescribeKnowledgeForBok** → – include → ○ **KnowledgeRepresentation**
- ⌘ ○ **ElementstoDescribeKnowledgeForBok** → – is associated with → ○ **KnowledgeResources**
- ⌘ ○ **ElementstoDescribeKnowledgeForBok** → – based\_on → ○ **Standards**
- ⌘ ○ **EvolutionOfBok** → – based\_on → ○ **Consensus**
- ⌘ ○ **EvolutionOfBok** → – involve → ○ **KnowledgeAcquisition**
- ⌘ ○ **EvolutionOfBok** → – include → ○ **ObjetiveOfBok**
- ⌘ ○ **EvolutionOfBok** → – apply\_to → ○ **TypeofBok**

- ⌘ ○ **HierarchicalOrganization** → – compose → ○ **KnowledgeAreas**
- ⌘ ○ **InstructionalSkills** → – is associated with → ○ **Capabilities**
- ⌘ ○ **InstructionalSkills** → – contain → ○ **Pedagogical**
- ⌘ ○ **InstructionalSkills** → – contain → ○ **Technical**
- ⌘ ○ **KnowledgeAcquisition** → – is associated with → ○ **LessonLearner**
- ⌘ ○ **KnowledgeAreas** → – correspond → ○ **BreakdownOfTopics**
- ⌘ ○ **KnowledgeAreas** → – contain → ○ **OrganizationOfKnowledgeArea**
- ⌘ ○ **KnowledgeCategories** → – based\_on → ○ **HierarchicalOrganization**
- ⌘ ○ **KnowledgeEducation** → – involve → ○ **Education**
- ⌘ ○ **KnowledgeOrganization** → – is associated with → ○ **ContentBok**
- ⌘ ○ **KnowledgeOrganization** → – based\_on → ○ **Structure**
- ⌘ ○ **KnowledgeRepresentation** → – based\_on → ○ **Concepts**
- ⌘ ○ **KnowledgeRepresentation** → – use → ○ **Ontology**
- ⌘ ○ **KnowledgeRepresentation** → – based\_on → ○ **Skills**
- ⌘ ○ **KnowledgeRepresentation** → – supported\_by → ○ **SupportingToolsForBok**
- ⌘ ○ **KnowledgeTools** → – based\_on → ○ **KnowledgeRepresentation**
- ⌘ ○ **KnowledgeTopic** → – contain → ○ **KnowledgeSubtopic**
- ⌘ ○ **KnowledgeUnit** → – involve → ○ **KnowledgeTopic**
- ⌘ ○ **Licensing** → – include → ○ **Certification**
- ⌘ ○ **Licensing** → – based\_on → ○ **Competences**
- ⌘ ○ **Model** → – contain → ○ **ConceptualModelOfBok**
- ⌘ ○ **Model** → – include → ○ **MetaModel**

- **ObjetiveOfBok** → – is associated with → ○ **ScopeOfDiscipline**
- **Ontology** → – based\_on → ○ **Model**
- **Ontology** → – include → ○ **Vocabulary**
- **OrganizationOfKnowledgeArea** → – compose → ○ **KnowledgeUnit**
- **ProfessionalCertification** → – is associated with → ○ **EvaluationPolicies**
- **ProfessionalCertification** → – is associated with → ○ **Licensing**
- **ProfessionalCertification** → – include → ○ **Professional Practice**
- **ProfessionalCertification** → – based\_on → ○ **ProfessionalDevelopmnet**
- **ProfessionalCertification** → – based\_on → ○ **ProfessionalStandard**
- **Reference** → – is associated with → ○ **Material**
- **Reference** → – keep → ○ **Matrix**
- **Reference** → – include → ○ **RelatedDisciplines**
- **Skills** → – is associated with → ○ **Capacites**
- **Skills** → – include → ○ **InstructionalSkills**
- **Standards** → – involve → ○ **ApplicationofStandards**
- **Standards** → – contain → ○ **TypesofStandards**
- **Structure** → – is associated with → ○ **KnowledgeCategories**
- **Taxonomy** → – have → ○ **ApplicationofTaxonomies**
- **Taxonomy** → – have → ○ **LevelsofTaxonomies**
- **Taxonomy** → – is associated with → ○ **TypeOfTaxonomies**
- **UniversityCurricula** → – is associated with → ● **AccreditationBok**
- **UniversityCurricula** → – is associated with → ○ **Curriculum**
